# Supplementary material
Source: PubMed Central journal article supplement (PMC7457187)

**A**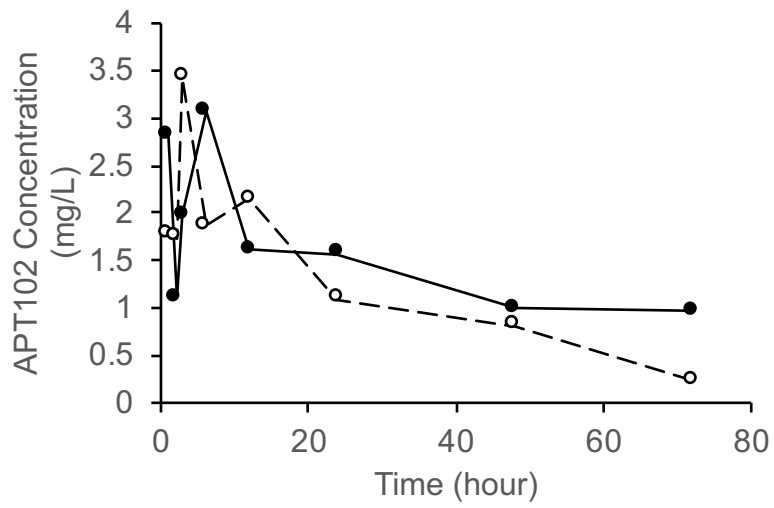**B**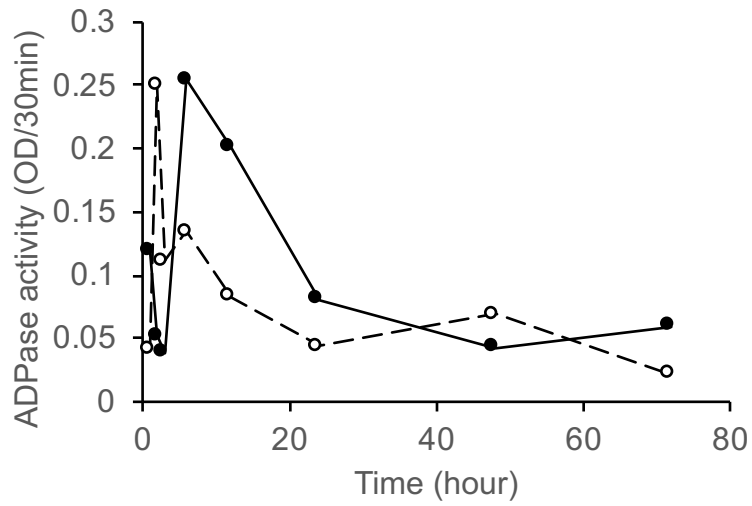

Supplement: jjz182_suppl_supplementary_fig_1hr.pdf [file jjz182_suppl_supplementary_fig_1hr.pdf]

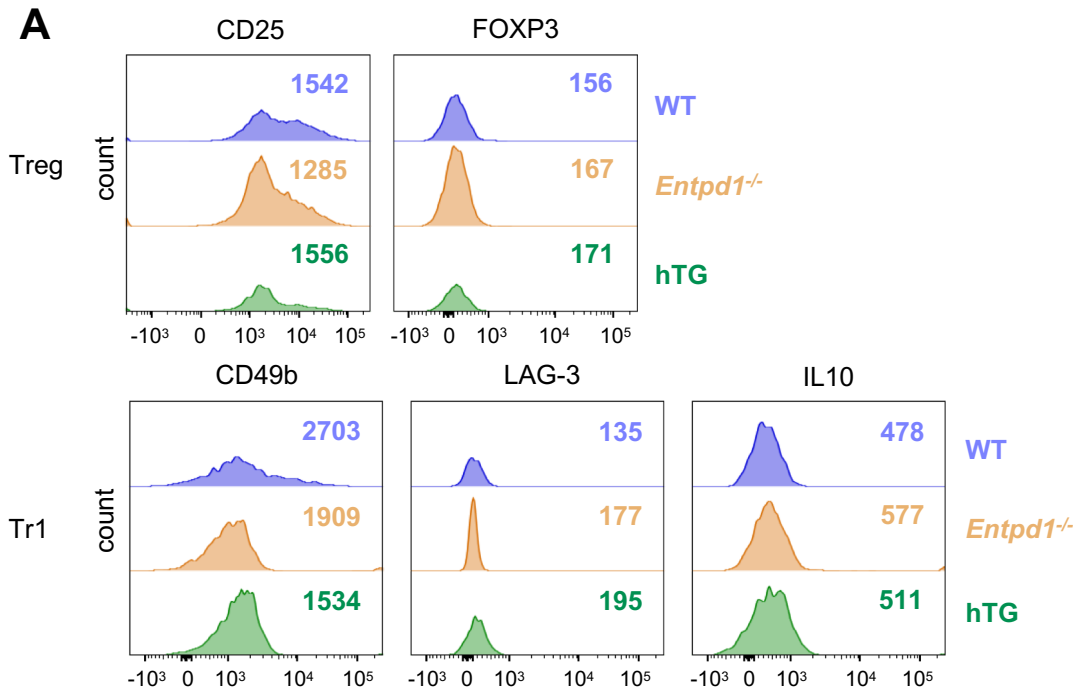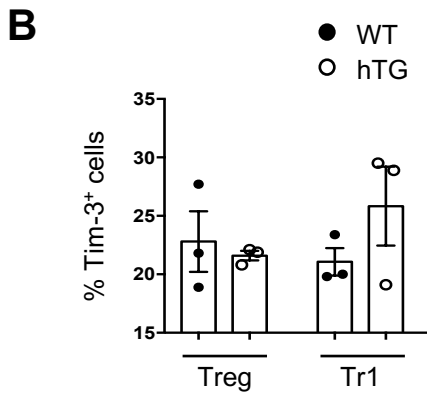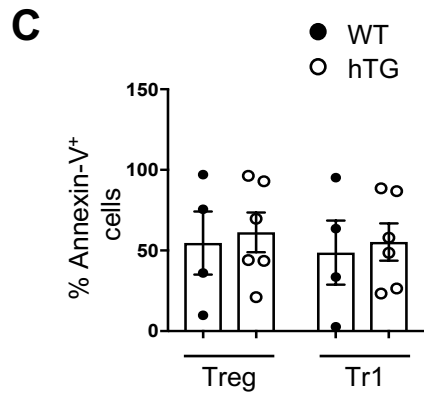

Supplement: jjz182_suppl_supplementary_fig_2hr.pdf [file jjz182_suppl_supplementary_fig_2hr.pdf]

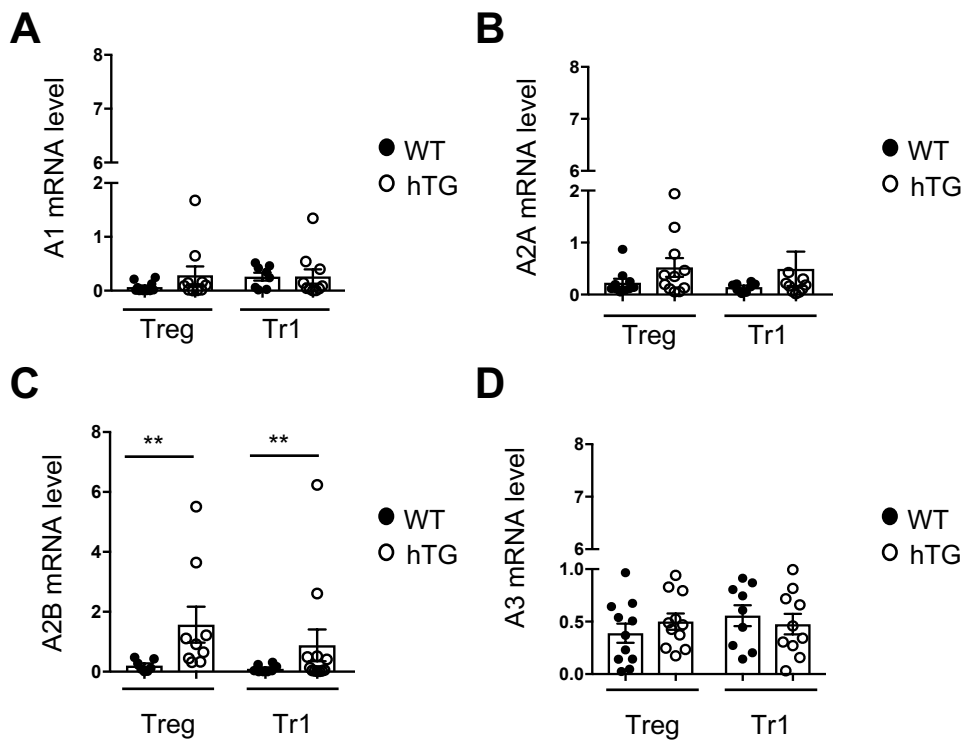

Supplement: jjz182_suppl_supplementary_fig_3hr.pdf [file jjz182_suppl_supplementary_fig_3hr.pdf]

**A**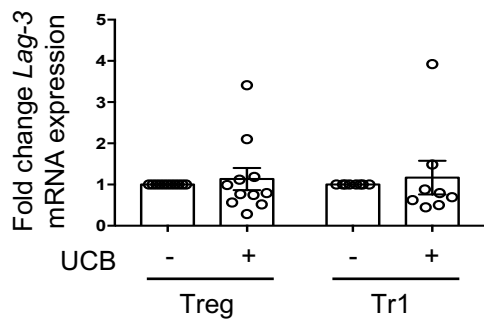**B**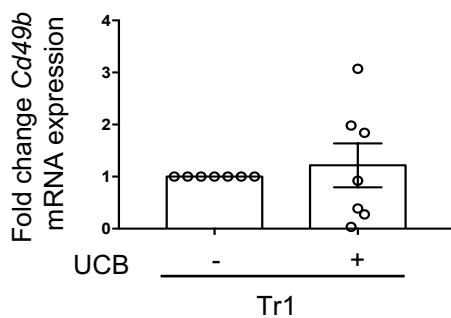**C**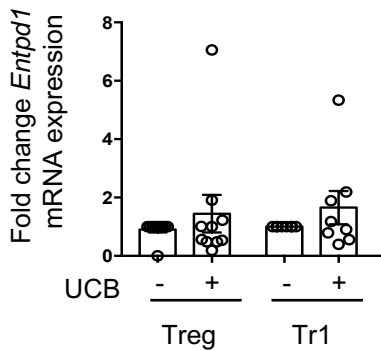**D**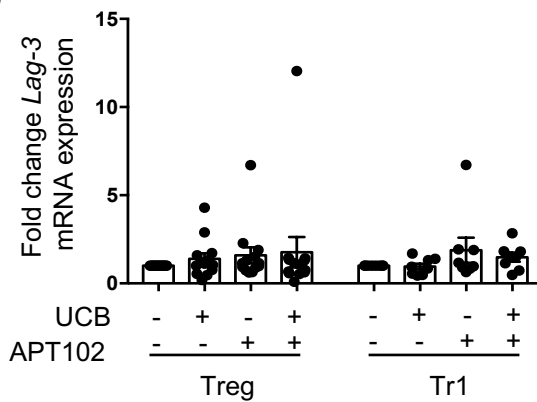**E**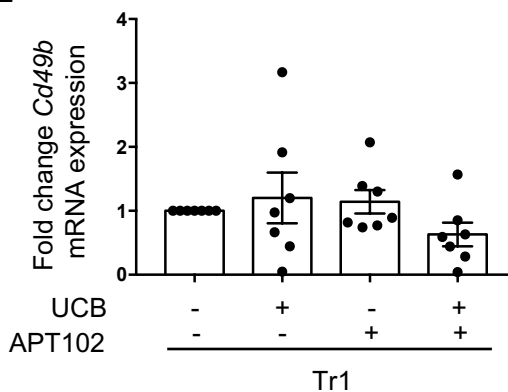**F**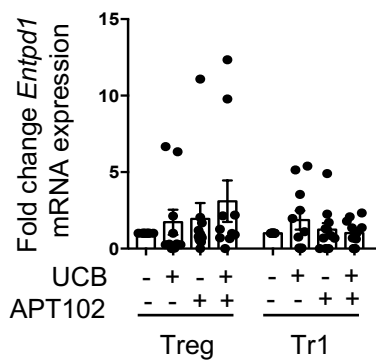

Supplement: jjz182_suppl_supplementary_fig_4hr.pdf [file jjz182_suppl_supplementary_fig_4hr.pdf]

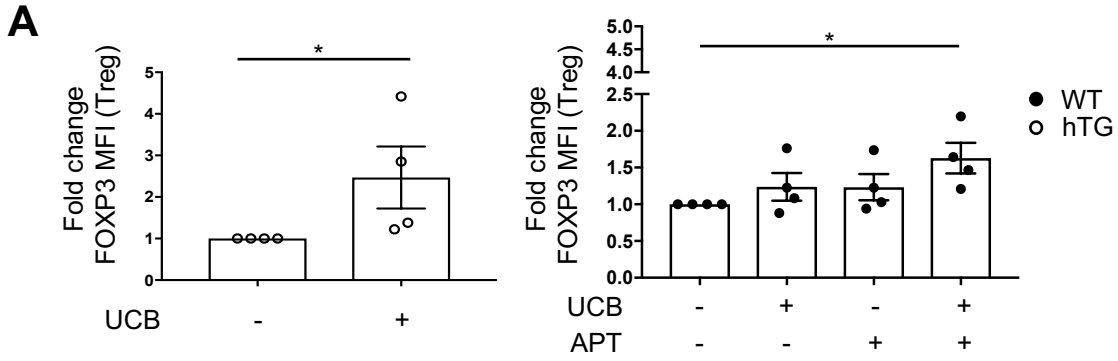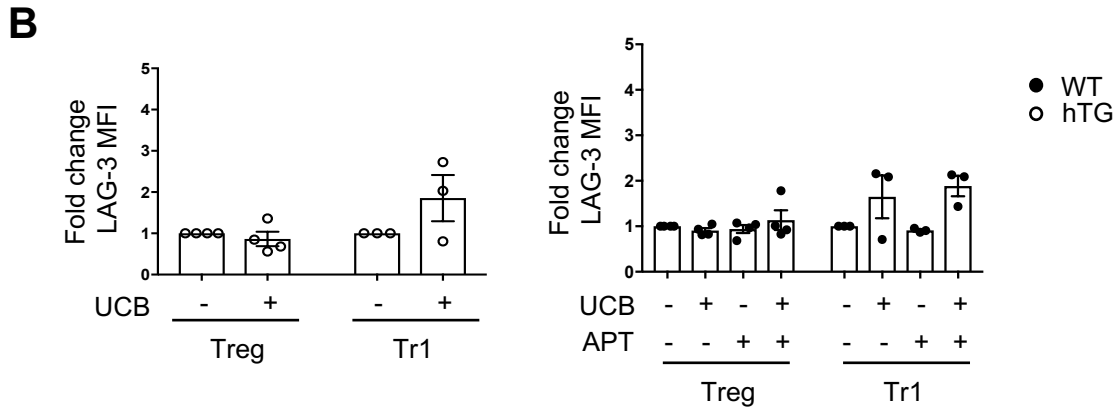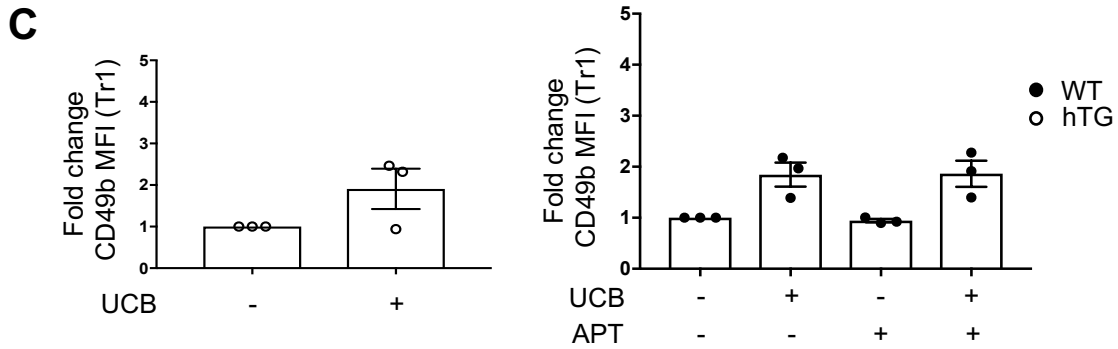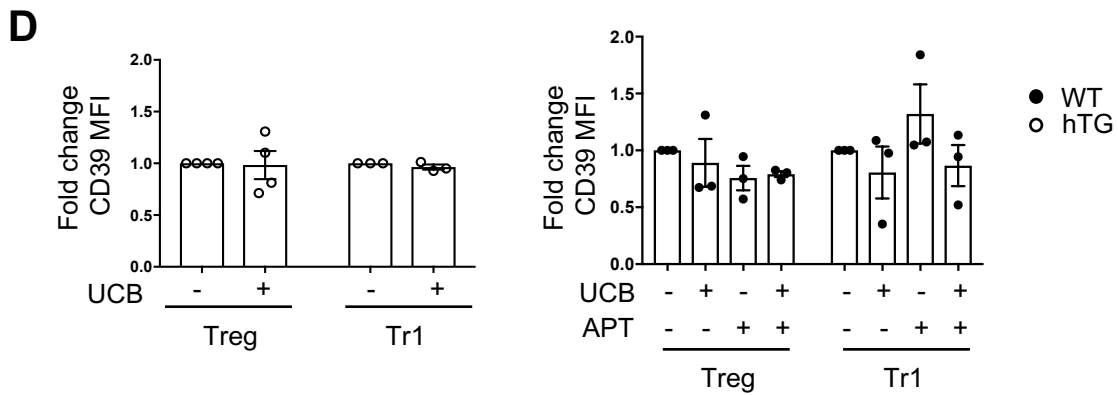

Supplement: jjz182_suppl_supplementary_fig_5hr.pdf [file jjz182_suppl_supplementary_fig_5hr.pdf]

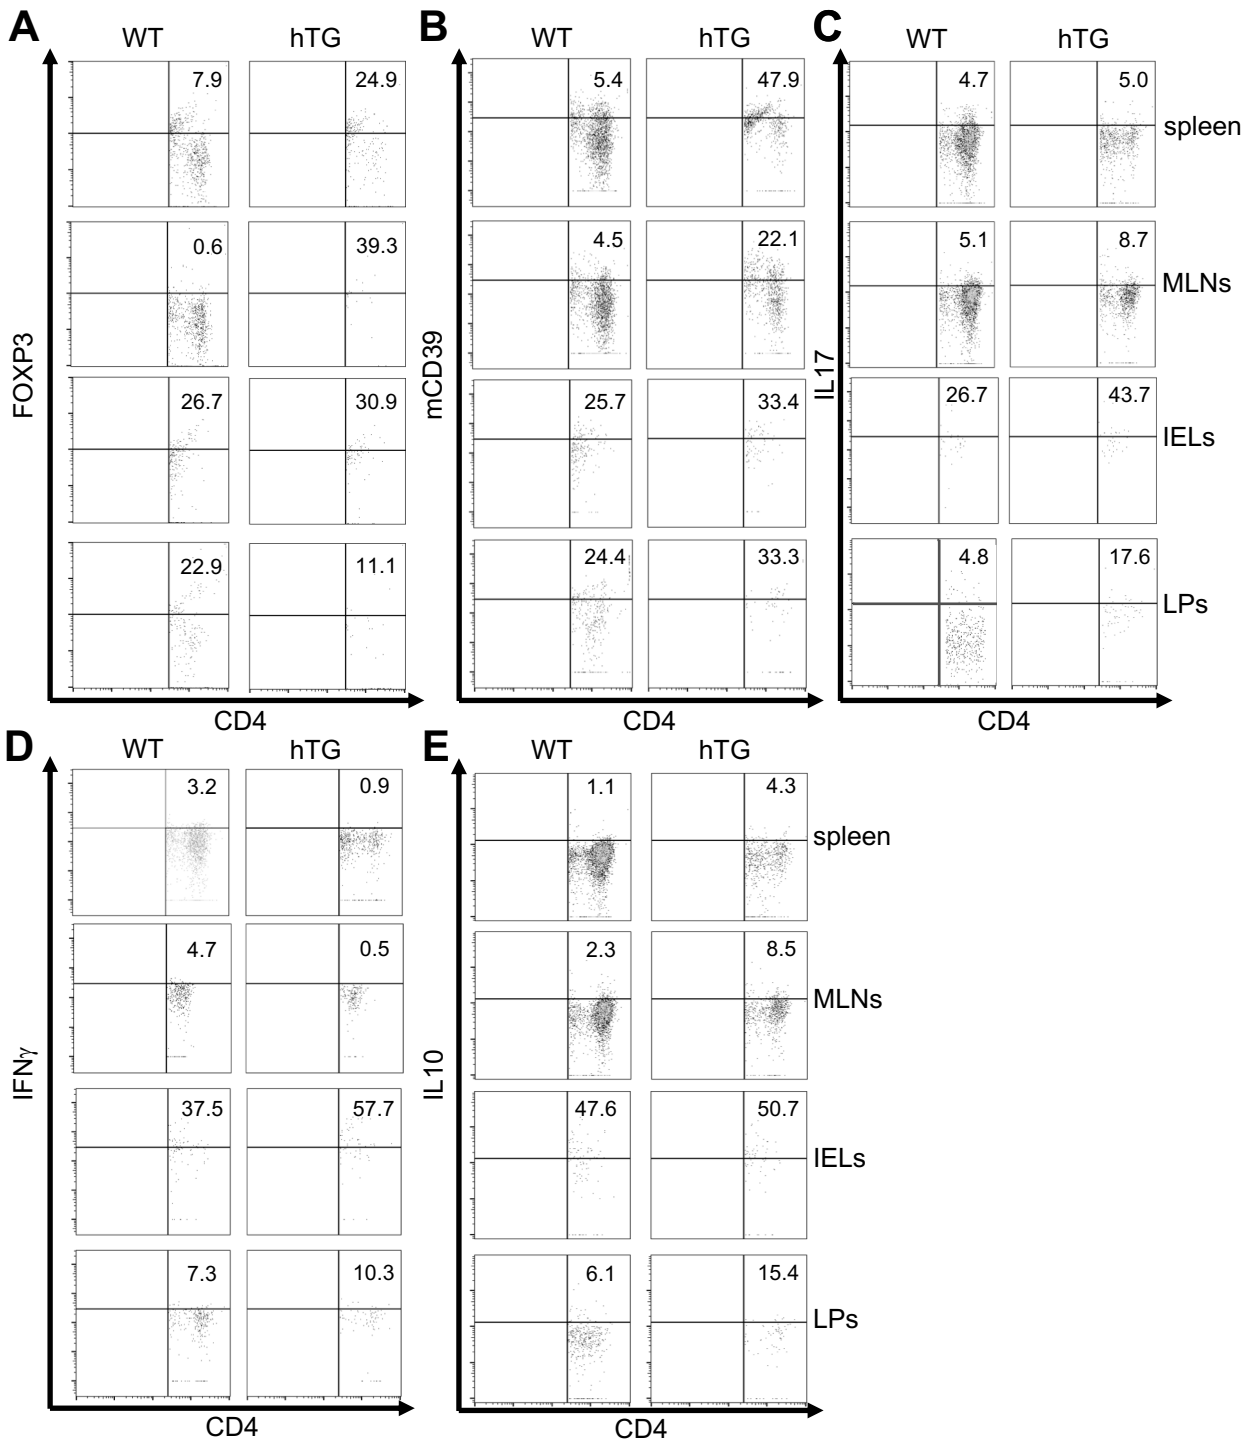

Supplement: jjz182_suppl_supplementary_fig_6hr.pdf [file jjz182_suppl_supplementary_fig_6hr.pdf]

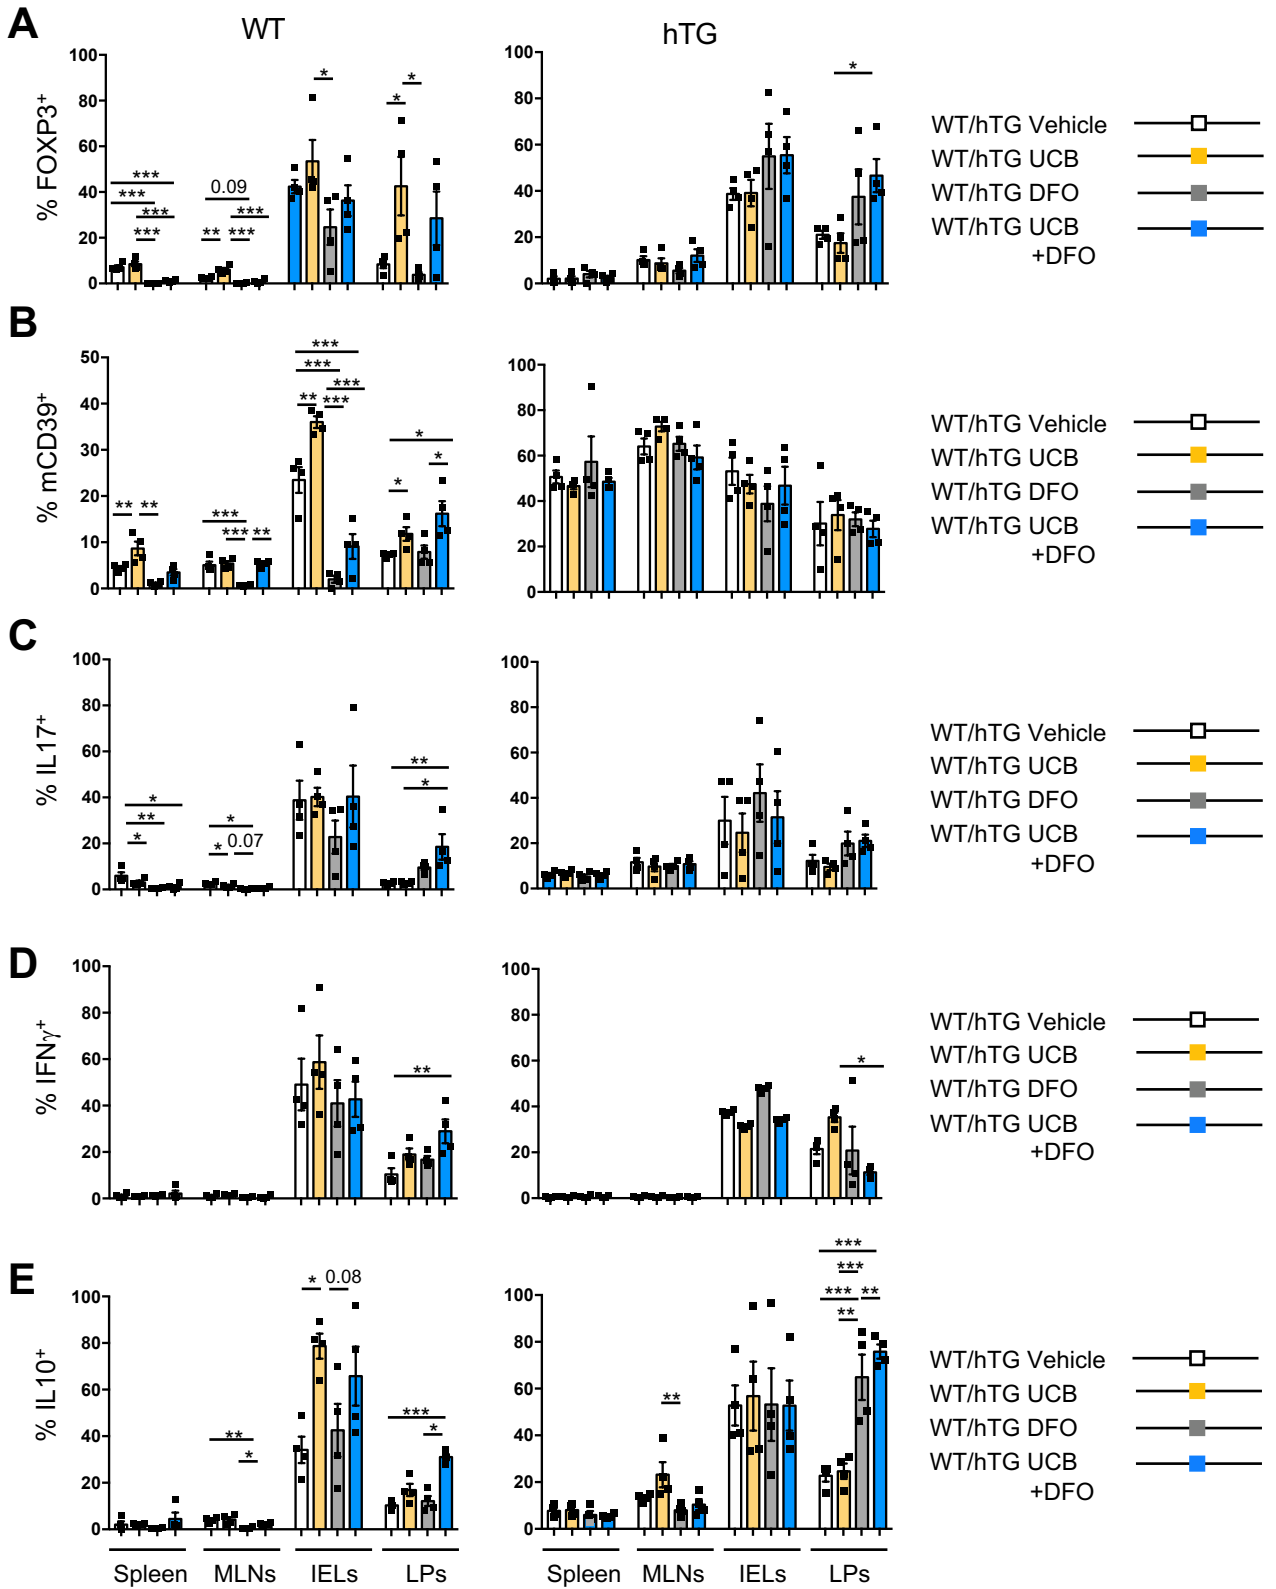

Supplement: jjz182_suppl_supplementary_fig_7hr.pdf [file jjz182_suppl_supplementary_fig_7hr.pdf]

**A**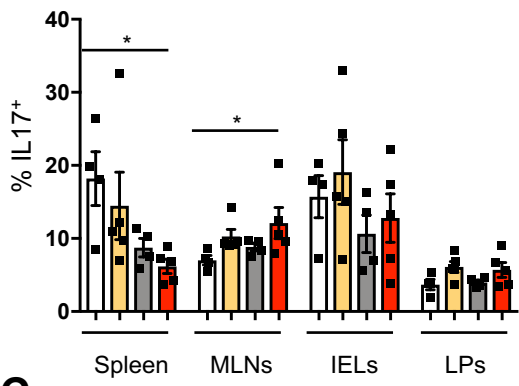**B**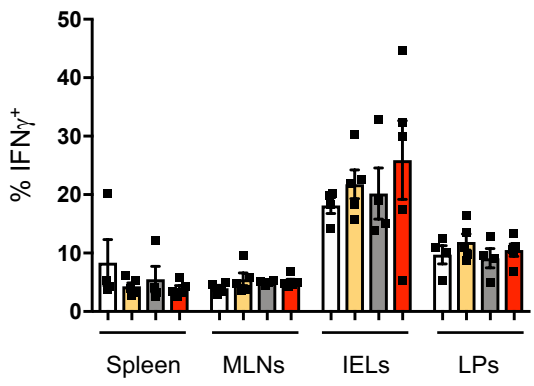**C**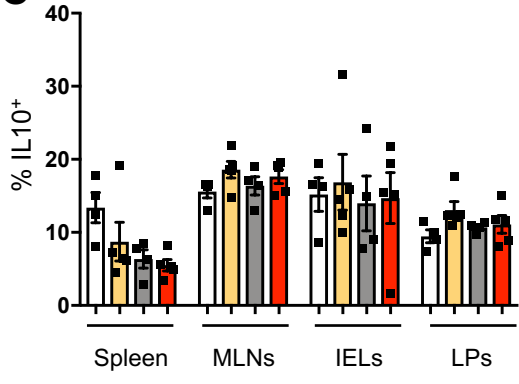

WT Vehicle   
 WT UCB   
 WT APT102   
 WT UCB+APT102 

Supplement: jjz182_suppl_supplementary_fig_8hr.pdf [file jjz182_suppl_supplementary_fig_8hr.pdf]

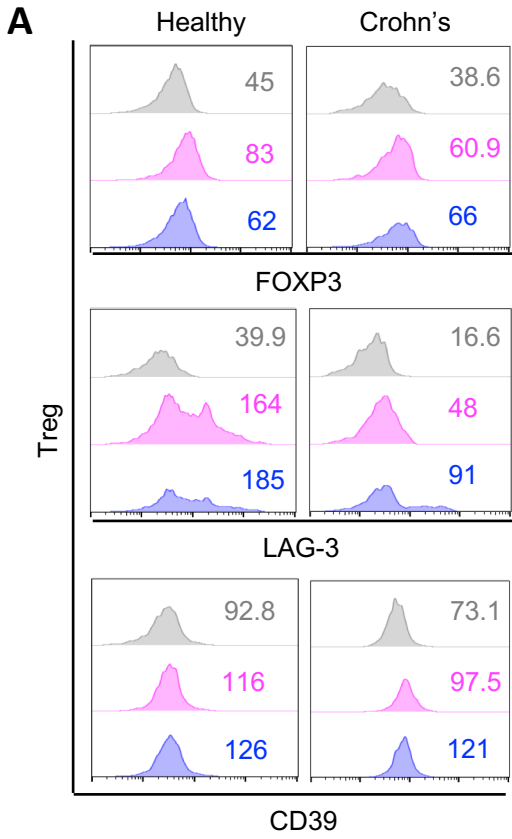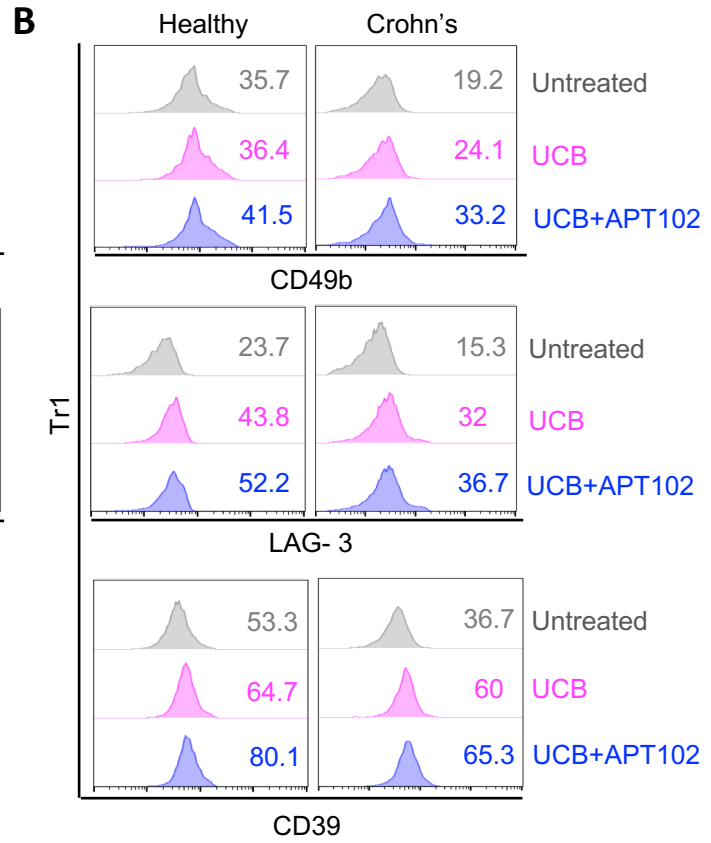

Supplement: jjz182_suppl_supplementary_fig_9hr.pdf [file jjz182_suppl_supplementary_fig_9hr.pdf]
